# Supplementary material
Source: HighWire-hosted journal article supplement (https://www.cmaj.ca/highwire/filestream/147362/field_highwire_adjunct_files/2/220914-res-3-at.pdf)

## Supplementary Figure 3a Calibration plots for prediction of major complications in women undergoing laparoscopic hysterectomy for benign indications in each region

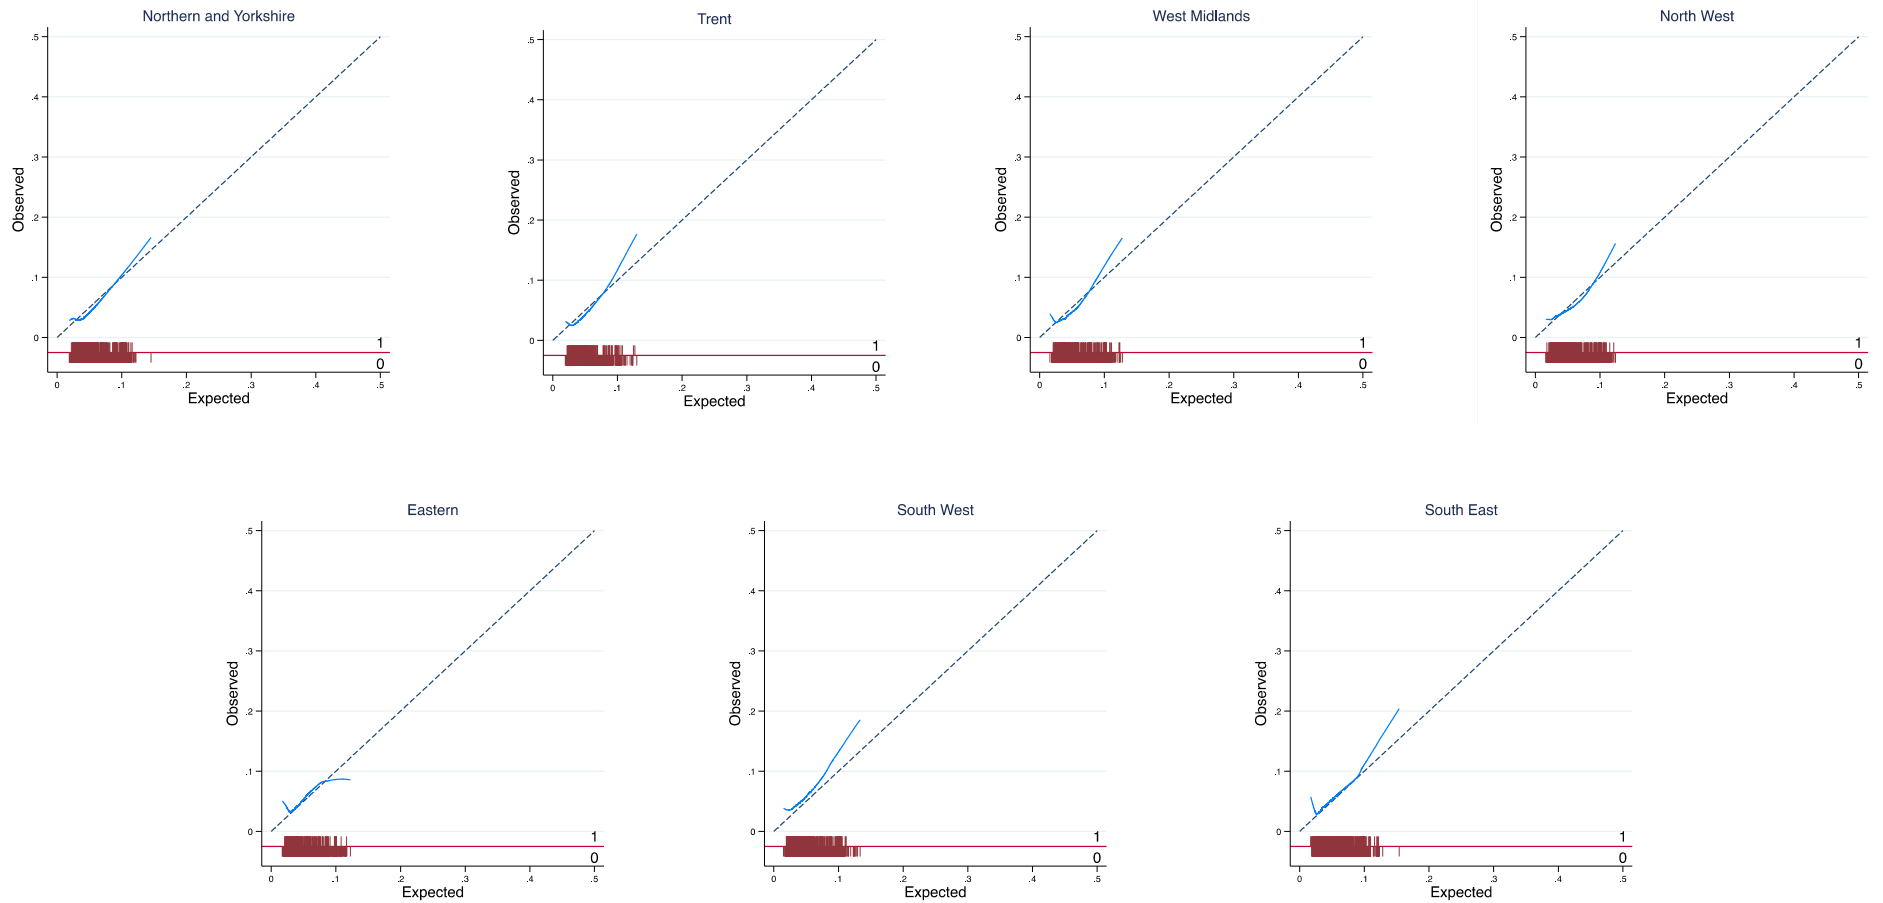

Appendix 3 as supplied by the authors. Appendix to: Madhvani K, Fernandez Garcia S, Fernandez-Felix BM, et al. Predicting major complications in patients undergoing laparoscopic and open hysterectomy for benign indications. *CMAJ* 2022. DOI: 10.1503/cmaj.220914. Copyright © 2022 The Author(s) or their employer(s). To receive this resource in an accessible format, please contact us at [cmajgroup@cmaj.ca](mailto:cmajgroup@cmaj.ca).

Supplementary Figure 3b Calibration plots for prediction of major complications in women undergoing abdominal hysterectomy for benign indications in each region

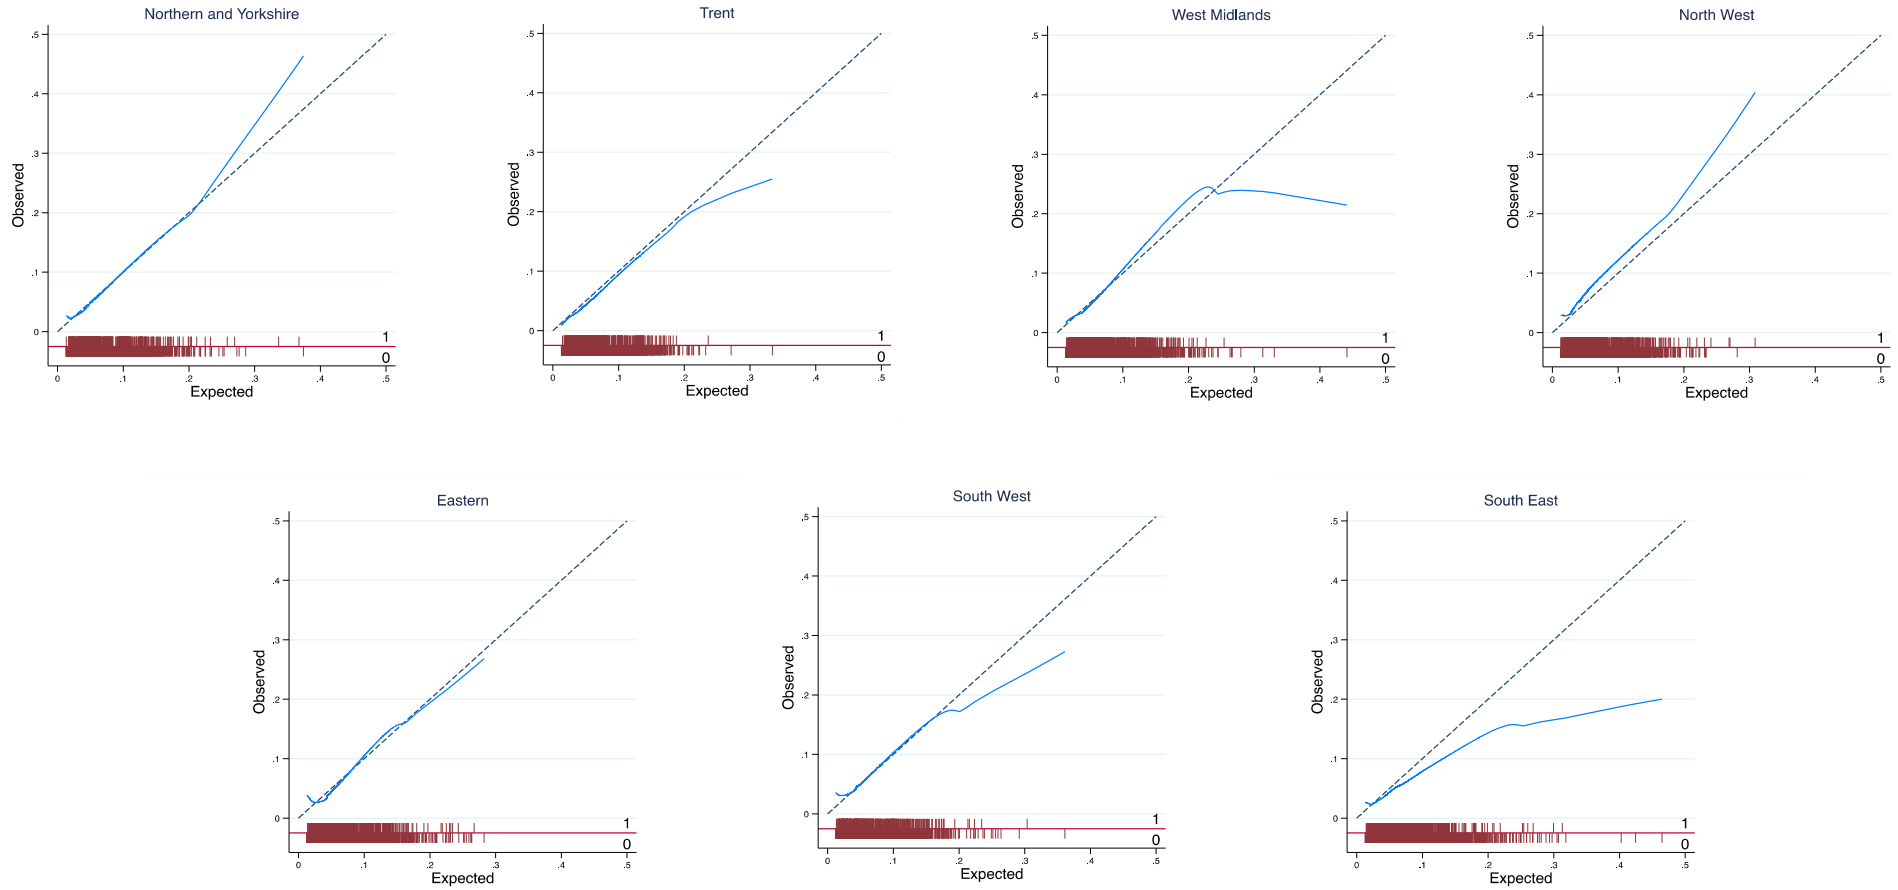

Supplement: 220914-res-3-at.pdf [file 220914-res-3-at.pdf]
